# Supplementary material for: Separation and detection of mutans streptococci by using magnetic nanoparticles stabilized with a cell wall binding domain-conjugated polymer
Source: Royal Society of Chemistry journal article supplement (doi:10.1039/c8ay00114f), 2018-01-01
Supplement: c8ay00114f1.pdf [file c8ay00114f1.pdf]

## Supplementary Information

### **Separation and Detection of Mutans Streptococci by Magnetic Nanoparticles Stabilized with Enzyme-conjugated Polymer**

Panida Thanyasrisung, Aemvika Vittayaprasit, Oranart Matangkasombut, Motoyuki Sugai  
Piyaporn Na Nongkai, Suttawan Saipia, Voravee Hoven

#### **Page**

- 2      Sequence of CWBD
- 5      **Fig. S1** Schematic plasmid map including CWBD (top) and the expressed CWBD protein on SDS-PAGE (bottom).
- 6      **Fig. S2** XRD pattern of bare MNPs prepared by a solvothermal method.
- 7      **Fig. S3** FT-IR spectra of MNPs: (a) unmodified, (b) grafted with PAA and (c) conjugated with CWBD.
- 8      **Table S1** Average size and zeta potential of MNPs measured by DLS.
- 9      **Fig. S4** TGA (under N<sub>2</sub>) curves of (a) unmodified MNPs, (b) PAA-grafted MNPs, and (c) CWBD-conjugated MNPs analyzed with a heating rate of 20°C /min.
- 10     Determination of Limit of Detection and Capture Efficiency.
- 11     **Fig. S5** Photographs of tested oral streptococci colonies on BHI agar plate before and after binding to CWBD-conjugated MNPs. The numbers represent the number of colony in CFU/mL.

**CWBD sequence**

```

                                     80          90          100
                               ctc gag gat gag caa aat caa tcc tta agt gca t
                               XhoI D E Q N Q S L S A S

110          120          130          140          150          160          170          180          190          200
ca gaa gtt att tct tct gat gcg aca tca gta tct gaa tta cca gcg aca aca gca cag ata agt cag gaa gtc aga aat aat gga caa gac agt act at
E V I S S D A T S V S E L P A T T A Q I S Q E V R N N G Q D S T I

210          220          230          240          250          260          270          280          290          300
t caa ttg cag caa aca cag gaa cag tct gat ccg ata aca agt acg tct gag aca act gtt tcc tct atg aag gcg gtc aca aat ggc tca cct gcc aaa
Q L Q Q T Q E Q S D P I T S T S E T T V S S M K A V T N G S P A K

310          320          330          340          350          360          370          380          390          400
gca aat gag act gaa aca gtt ccg tct cag gca agt act gct agt tct gtg cag act cct gat cag att tcg act gtt ccc tct gta aaa gca gaa acc a
A N E T E T V P S Q A S T A S S V Q T P D Q I S T V P S V K A E T T

410          420          430          440          450          460          470          480          490          500
ct tct acc gca gat caa tta caa tca aca tca tct gct cct ttg gat caa caa act gat gct aaa cgt ctt tcc aat aaa atg act cca gca agc agc gt
S T A D Q L Q S T S S A P L D Q Q T D A K R L S N K M T P A S S V

510          520          530          540          550          560          570          580          590          600
a caa gct cgt tct tct ctt aca caa gac aag caa gta cag gca cag gaa gtc aca agt gct gta gtg gaa gaa aaa ggg att aag cta cag tat aac ggt
Q A R S S L T Q D K Q V Q A Q E V T S A V V E E K G I K L Q Y N G

610          620          630          640          650          660          670          680          690          700
cag atc gct cga aat act aag att caa ttt gct gtc tgg tca gct cga aat gat caa gat gat ctt caa tgg tat acg gca aat aat atg gga gcg gcc t
Q I A R N T K I Q F A V W S A R N D Q D D L Q W Y T A N N M G A A Y

710          720          730          740          750          760          770          780          790          800
at gct gaa ttc aag aat cat cgt gag tat ggg acc tat tat gtt cat act tat gct aat caa aat ggc aag atg ata gga ctt aac gca aca act ctt ac
A E F K N H R E Y G T Y Y V H T Y A N Q N G K M I G L N A T T L T

810          820          830          840          850          860          870          880          890          900
a att gct caa cct cag gtg caa act aat att caa aga aaa tca gca acg aat ttt gag tta acc gtt tct aat gtt cct aat act att agc agc atc atg
I A Q P Q V Q T N I Q R K S A T N F E L T V S N V P N T I S S I M

910          920          930          940          950          960          970          980          990          1000
gta cct gtc tgg tca gat caa aac ggt caa gat gat att aaa tgg tat aat gcc cga aag gct gat gat ggc agt tat aag gct ttg att gat act aaa a
V P V W S D Q N G Q D D I K W Y N A R K A D D G S Y K A L I D T K N
```

1010            1020            1030            1040            1050            1060            1070            1080            1090            1100  
 at cac aag aat gat ttg gga cat tat gaa gct cat att tac ggc tac agc aca gta acc cag tct caa att ggc tta gct gtt agt tct ggt ttt gac cg  
   H K N D L G H Y E A H I Y G Y S T V T Q S Q I G L A V S S G F D R

1110            1120            1130            1140            1150            1160            1170            1180            1190            1200  
 c aat gat act aga ccc aat gca agg ata tct gtt gct gat tat gac caa aat aaa acg acc ttt gat gtt gtt gtt gag ggt tca tct gat aca aag act  
   N D T R P N A R I S V A D Y D Q N K T T F D V V V E G S S D T K T

1210            1220            1230            1240            1250            1260            1270            1280            1290            1300  
 gta tct gct gtt aat att gct gtt tgg tct gaa gat aaa ggt caa gat gac ctt aag tgg tat tca cca aaa att gtc aac aat aag gca act gtg acg a  
   V S A V N I A V W S E D K G Q D D L K W Y S P K I V N N K A T V T I

1310            1320            1330            1340            1350            1360            1370            1380            1390            1400  
 tt aat atc gct aat cat tca aat act tca gat aaa tat aat gtc cat gtt tat aca gac tac act gat ggg aca cat tct ggt act att tta ggg gct ta  
   N I A N H S N T S D K Y N V H V Y T D Y T D G T H S G T I L G A Y

1410            1420            1430            1440            1450            1460            1470            1480            1490            1500  
 t cag atc aat aaa ccg ctt gag aaa aat act gtt tca gct gat tta act agt gat ggc att gct ctc aaa tta gat tca aac acg gtt aca gat tat acc  
   Q I N K P L E K N T V S A D L T S D G I A L K L D S N T V T D Y T

1510            1520            1530            1540            1550            1560            1570            1580            1590            1600  
 aaa gta cga ttt gcc gtt tgg tcg gat caa aat ggt caa gat gat ctc aag tgg tat agt gca aat agt gat gga gcg gca act gca gct tac agt aac c  
   K V R F A V W S D Q N G Q D D L K W Y S A N S D G A A T A A Y S N H

1610            1620            1630            1640            1650            1660            1670            1680            1690            1700  
 ac agt ggt tat ggg ctt tat cat atc cat act tat att att aaa gat ggg gaa atg gtt ggg ctt aat ggc aga acg ata act att aat cag cct agt gc  
   S G Y G L Y H I H T Y I I K D G E M V G L N G R T I T I N Q P S A

1710            1720            1730            1740            1750            1760            1770            1780            1790            1800  
 c aag gtt gat att gct aaa gaa tcc gat gct ctt tat aaa gtg act gtt tct aac ctg cca gct tac att agt tca gta gct att cct gtc tgg aca gat  
   K V D I A K E S D A L Y K V T V S N L P A Y I S S V A I P V W T D

1810            1820            1830            1840            1850            1860            1870            1880            1890            1900  
 aaa aac aat caa gat gat att caa tgg att ctc gcg aca aaa caa ggt gat gga acc tac gca gcg caa att cag tta gct gat cat aat ggg gaa aca g  
   K N N Q D D I Q W I L A T K Q G D G T Y A A Q I Q L A D H N G E T G

1910            1920            1930            1940            1950            1960            1970            1980            1990            2000  
 gc cat tat aat gtt cat gtc tat gga caa agt aaa ttt gac aat aaa acg gtt ggc tta gca gca act gat ggc ttt aat gtt gca gag aca agg aat gc  
   H Y N V H V Y G Q S K F D N K T V G L A A T D G F N V A E T R N A

2010 2020 2030 2040 2050 2060 2070 2080 2090 2100  
t gtt atc gct gct tca aat tat aat gcc agt gca gga acg ata gat atg att gtt aaa caa gaa gcg ggt ggt aaa gcg atc aaa gaa gtt cgg ata gct  
V I A A S N Y N A S A G T I D M I V K Q E A G G K A I K E V R I A

2110 2120 2130 2140 2150 2160 2170 2180 2190 2200  
gct tgg tca gaa gct gat caa tct aac ctt cat tgg tat gtt tca tca act att att gat ggt aag gta aca gtc acc att aat gaa aaa aat cat caa t  
A W S E A D Q S N L H W Y V S S T I I D G K V T V T I N E K N H Q Y

2210 2220 2230 2240 2250 2260 2270 2280 2290 2300  
at att aaa gga aat tat aac att cat gtc tat gtt gat tat act gat ggc act agt agc gga acc aat att gga aac tat agc ttg aat gct gat aaa cc  
I K G N Y N I H V Y V D Y T D G T S S G T N I G N Y S L N A D K P

2310  
t gct gtt gct ctg cca **gga tcc** aga tct **cat cac cat cac cat cac** taa gct t  
A V A L P BamHI BglII H H H H H H HindIII

6xHis

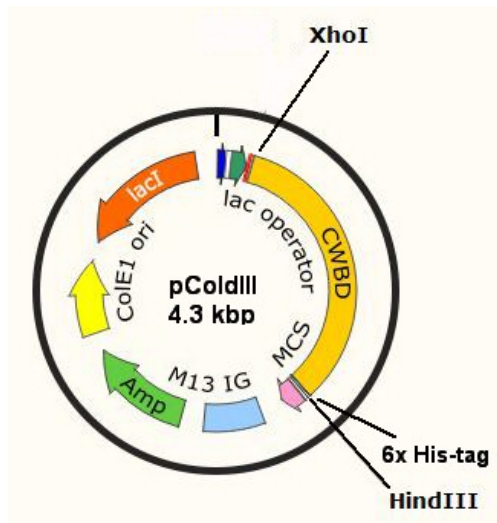

**All 4 lanes in this SDS-PAGE are CWBD**

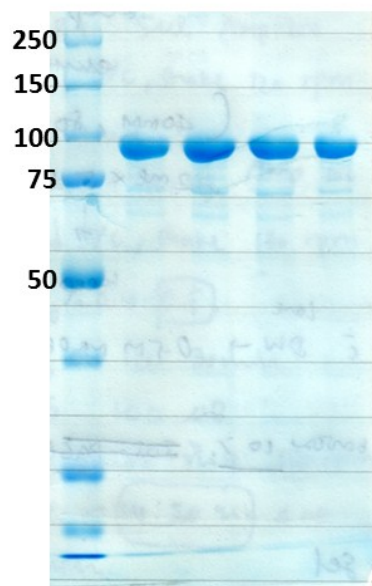

**Fig. S1** Schematic plasmid map including CWBD (top) and the expressed CWBD protein on SDS-PAGE (bottom).

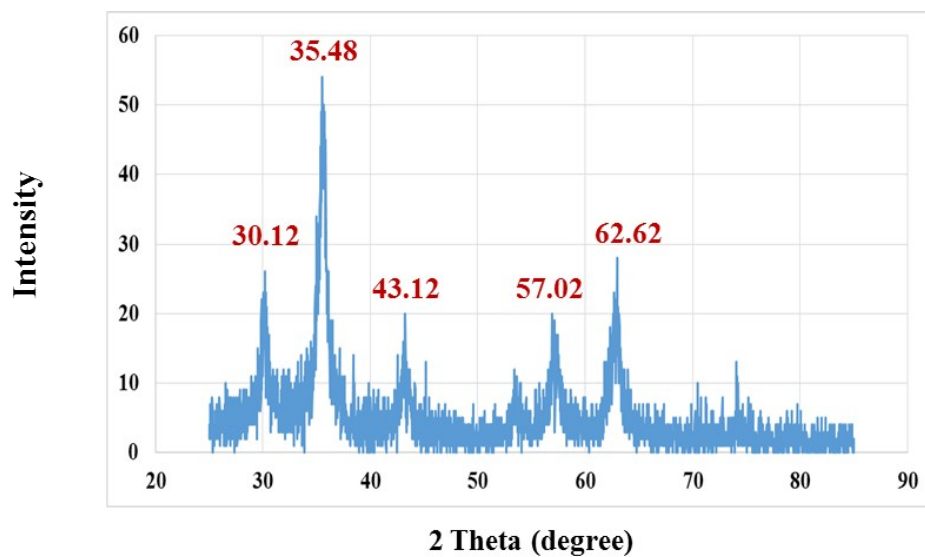

**Fig. S2** XRD pattern of bare MNPs prepared by a solvothermal method.

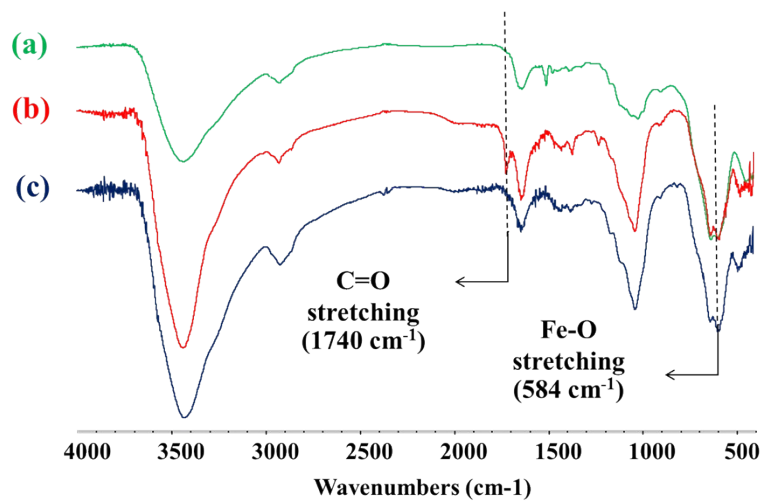

**Fig. S3** FT-IR spectra of MNPs: (a) unmodified, (b) grafted with PAA and (c) conjugated with CWBD.

**Table S1** Average size and zeta potential of MNPs measured by DLS.

| Sample               | Hydrodynamic size (nm) | PDI  | Zeta potential (mV) |
|----------------------|------------------------|------|---------------------|
| Bare MNPs            | $318 \pm 18$           | 0.30 | -18.00              |
| PAA-grafted MNPs     | $460 \pm 21$           | 0.37 | -31.43              |
| CWBD-conjugated MNPs | $627 \pm 20$           | 0.31 | -14.40              |



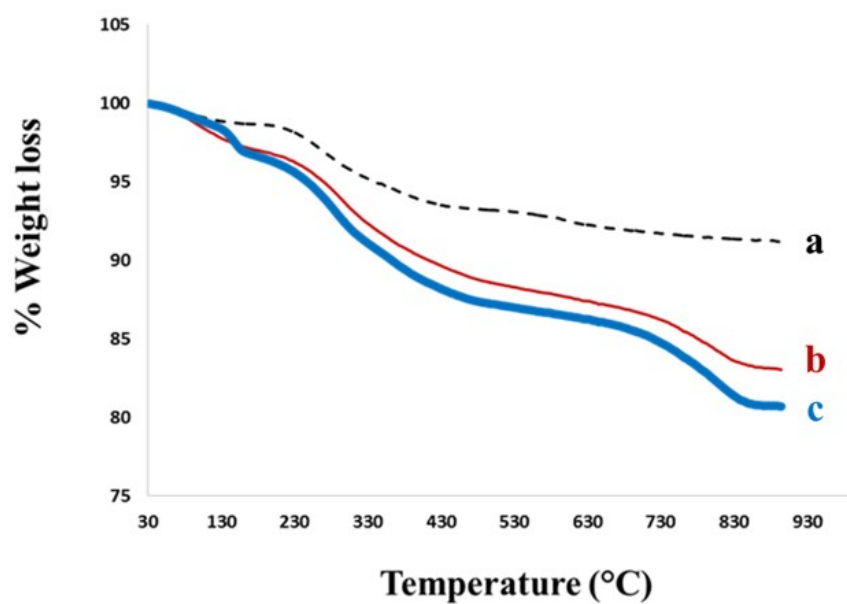

**Fig. S4** TGA (under N<sub>2</sub>) curves of (a) unmodified MNPs, (b) PAA-grafted MNPs, and (c) CWBD-conjugated MNPs analyzed with a heating rate of 20°C /min.

## Determination of Limit of Detection and Capture Efficiency

$I_{LOD}$  represents the intensity at LOD which is calculated from the equation below whereas  $I_0$  reflects the intensity of the background and  $SD_0$  is standard deviation of the background.

$$I_{LOD} = 3SD_0 + I_0 \quad (\text{eq.S1})$$

After that, LOD was calculated from  $I_{LOD}$  using linear equation of the calibration curve as shown below, where  $m$  and  $c$  are slope and intercept of the calibration curve, respectively.

$$I = m \log(CFU) + c \quad (\text{eq.S2})$$

By substitute  $I_{LOD}$  and LOD into the equation, it can then be rearranged as shown below:

$$LOD = 10^{(I_{LOD} - c)/m} \quad (\text{eq.S3})$$

$C_{\text{before}}$  represents the number of colonies formed on the agar plate by diluted bacteria stock in PBS whereas  $C_{\text{after}}$  reflects the number of the unbound bacteria after contacting with the CWBD-conjugated MNPs

$$\text{Capture efficiency (\%)} = \{(C_{\text{before}} - C_{\text{after}}) / C_{\text{before}}\} \times 100$$

(eq.S4)

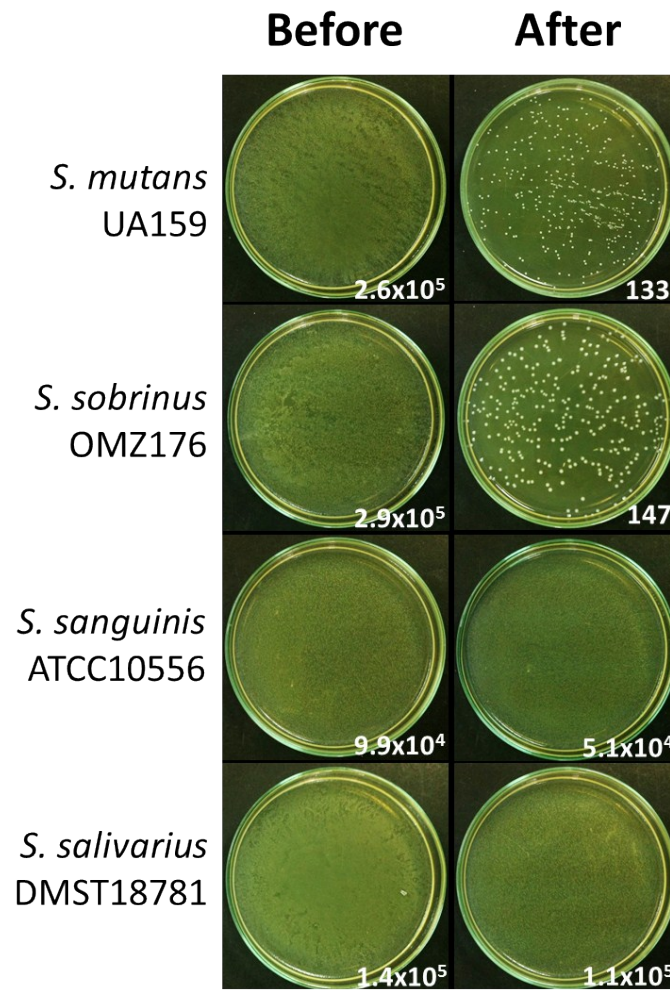

**Fig. S5** Photographs of tested oral streptococci colonies on BHI agar plate before and after binding to CWBD-conjugated MNPs. The numbers represent the number of colony in CFU/mL.
